# Supplementary material
Source: bioRxiv or medRxiv preprint supplement (https://www.biorxiv.org/highwire/filestream/101088/field_highwire_adjunct_files/16/324509-9.pdf)
Supplement: Supplementary file [file 324509-9.pdf]

**Supplementary Table 1.** Clinical characteristics of individual participants

| Study ID | Age | Gender | Race/ethnicity    | Year of HIV diagnosis | Year ART started | Year since uninterrupted ART | Reported nadir | ART regimen                               | Baseline bulk culture 3BNC117 IC <sub>50</sub> |
|----------|-----|--------|-------------------|-----------------------|------------------|------------------------------|----------------|-------------------------------------------|------------------------------------------------|
| 601      | 56  | M      | White             | 1994                  | 1997             | 2007                         | 350            | lopinavir/ritonavir/abacavir/lamivudine   | 3.03                                           |
| 602      | 49  | M      | White             | 2009                  | 2011             | 2011                         | 500            | raltegravir/emtricitabine/TDF             | 3.21                                           |
| 603      | 43  | M      | White/Hispanic    | 2003                  | 2005             | 2005                         | 300            | efavirenz/emtricitabine/TDF               | 0.513                                          |
| 604      | 29  | M      | Black             | 2008                  | 2009             | 2009                         | 300            | emtricitabine/rilpivirine/TDF             | 2.347                                          |
| 605      | 36  | M      | White/Hispanic    | 2001                  | 2002             | 2014                         | 372            | emtricitabine/rilpivirine/TDF             | 0.486                                          |
| 608      | 50  | M      | Black             | 1992                  | 2013             | 2014                         | 250            | dolutegravir/ emtricitabine/TDF           | >20                                            |
| 609      | 39  | M      | White             | 2014                  | 2014             | 2014                         | 400            | dolutegravir/ emtricitabine/TDF           | 0.136                                          |
| 610      | 29  | M      | White             | 2011                  | 2012             | 2012                         | 380            | emtricitabine/rilpivirine/TDF             | 0.324                                          |
| 611      | 57  | M      | White             | 2002                  | 2003             | 2003                         | 282            | emtricitabine/rilpivirine/TDF             | 1.018                                          |
| 613      | 50  | M      | Multiple/Hispanic | 1997                  | 1998             | 2006                         | 300            | atazanavir/ritonavir/emtricitabine/TDF    | 0.996                                          |
| 614      | 58  | M      | Black             | 2000                  | 2000             | 2000                         | 350            | efavirenz/emtricitabine/TDF               | >20                                            |
| 615      | 34  | M      | Multiple          | 2011                  | 2011             | 2011                         | 411            | emtricitabine/rilpivirine/TDF             | 1.142                                          |
| 616      | 30  | M      | Black             | 2004                  | 2005             | 2005                         | 400            | emtricitabine/rilpivirine/TDF             | 0.371                                          |
| 618      | 26  | M      | Black             | 2014                  | 2015             | 2015                         | 450            | abacavir/dolutegravir/lamivudine          | 1.96                                           |
| 619      | 53  | F      | Black             | 1992                  | 1995             | 2013                         | 280            | elvitegravir/cobicistat/emtricitabine/TAF | 0.59                                           |
